# Supplementary material
Source: HighWire-hosted journal article supplement (https://jnm.snmjournals.org/highwire/filestream/95413/field_highwire_adjunct_files/0/221929_Supplemental_Data.pdf)

**SUPPLEMENTAL FIGURE 1.** Treatment algorithm

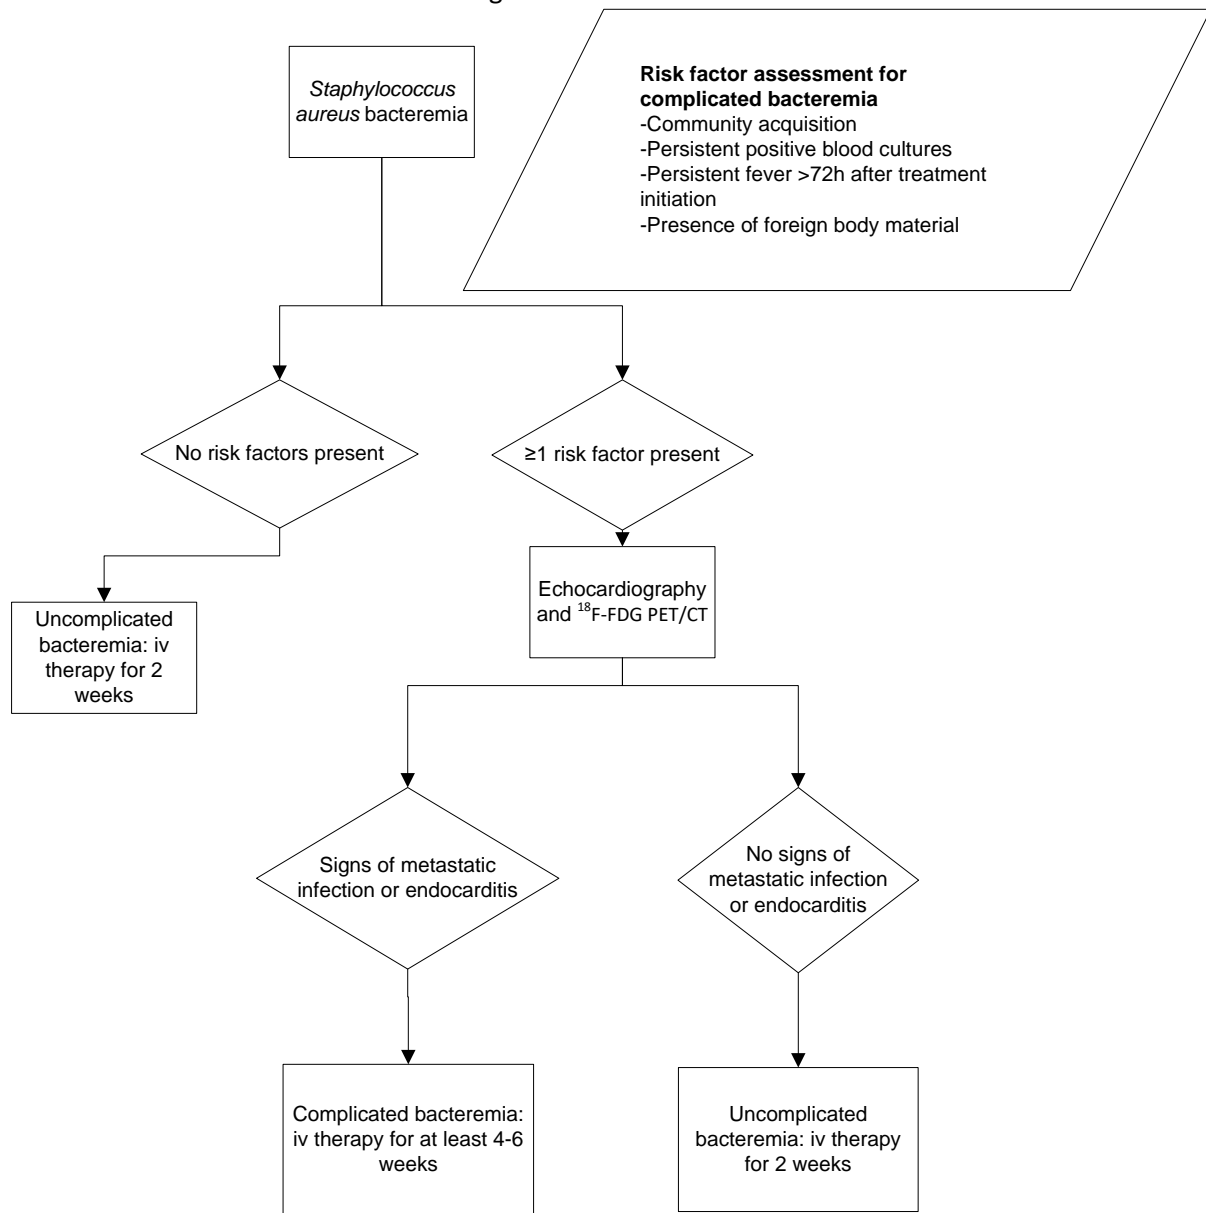

Supplement: 221929_Supplemental_Data.pdf [file 221929_Supplemental_Data.pdf]
